# Supplementary material
Source: HighWire-hosted journal article supplement (https://bmjopenquality.bmj.com/content/7/3/e000355)
Supplement: inline-supplementary-material-2 [file inline-supplementary-material-2.pdf]

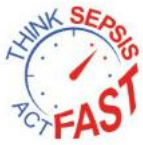

ADULT SEPSIS PATHWAY

WRITE PATIENT DETAILS OR AFFIX PATIENT LABEL

Surname: \_\_\_\_\_

Given Names: \_\_\_\_\_

Unit Number: \_\_\_\_\_

Date of Birth: \_\_\_\_\_

**Does your patient have a known or suspected infection?**

**Does your patient have any of the following sepsis risk factors, signs or symptoms?**

- History of fever or rigors
- Neutropenia or recent chemotherapy
- Indwelling medical devices
- Recent surgery or invasive procedure
- Skin: cellulitis, wounds
- Chest: cough, shortness of breath
- Abdomen: pain, peritonism
- Neuro: decreased mental alertness, headache
- Urine: dysuria, frequency

**PLUS**

**Does your patient have  $\geq 2$  signs of SEVERE SEPSIS?**

- SBP  $< 100$  mmHg
- Altered mental status
- Lactate  $> 2$  mmol/L

**YES**

This patient is at risk of rapid deterioration / septic shock

**OR**

**Early warning signs of sepsis:**

**$\geq 2$  SIRS criteria:**

- Temperature  $< 36^{\circ}\text{C}$  or  $> 38^{\circ}\text{C}$
- Heart Rate  $> 90$  per minute
- Respiratory Rate  $> 20$  per minute
- WCC  $< 4$  or  $> 12 \times 10^9/\text{L}$

SIRS = systemic inflammatory response syndrome

**YES**

Patient may have sepsis

**NO**

Does your patient have a Goals of Care and/or Advance Care Plan?  
Review before proceeding

**If sepsis most likely then  
COMMENCE SEPSIS PATHWAY**  
Notify the Unit Registrar/Consultant  
Consider MET call or ICU review as required

**Look for other causes:**

- Transfusion reaction
- Myocardial infarct
- Haemorrhage
- Ischaemia
- Pulmonary embolism
- Drug reaction

**Patient requires:**

- Clinical review
- Repeat observations within 30 minutes and manage accordingly
- Re-evaluation for sepsis

**RECOGNISE, RESUSCITATE & REFER**

**ADULT SEPSIS PATHWAY**

**Six key actions in 60 minutes:**

1. Oxygen administration
2. Two sets of blood cultures
3. Venous blood lactate
4. Fluid resuscitation
5. Intravenous antibiotics
6. Monitoring observations and fluid balance

*\*Cancer patients currently undergoing systemic chemotherapy require first antibiotic within 30 minutes*

**Coding statement (medical officer required to complete):**

**This patient was treated for GENERALISED SEPSIS during this hospital admission:**

Name \_\_\_\_\_ Designation \_\_\_\_\_ Signature \_\_\_\_\_ Pager/ph. \_\_\_\_\_

**MR63T**

## ADULT SEPSIS PATHWAY

Surname: \_\_\_\_\_

Given Names: \_\_\_\_\_

Unit Number: \_\_\_\_\_

Date of Birth: \_\_\_\_\_

First 30 minutes from presenting signs/symptoms

|                                                                      |                                                                                                                                                                                                                                                                                                                                                                                                                                                                                                                                                                                                                                                                                                                                                                                                                                                                                                                                                                  |                                                                                                                                                                                                                                                                                                                                                                                                                                                                                                                                                                                                                                                                                              |
|----------------------------------------------------------------------|------------------------------------------------------------------------------------------------------------------------------------------------------------------------------------------------------------------------------------------------------------------------------------------------------------------------------------------------------------------------------------------------------------------------------------------------------------------------------------------------------------------------------------------------------------------------------------------------------------------------------------------------------------------------------------------------------------------------------------------------------------------------------------------------------------------------------------------------------------------------------------------------------------------------------------------------------------------|----------------------------------------------------------------------------------------------------------------------------------------------------------------------------------------------------------------------------------------------------------------------------------------------------------------------------------------------------------------------------------------------------------------------------------------------------------------------------------------------------------------------------------------------------------------------------------------------------------------------------------------------------------------------------------------------|
| Recognise                                                            | Location: _____ Date: __/__/__ Time: ____:____                                                                                                                                                                                                                                                                                                                                                                                                                                                                                                                                                                                                                                                                                                                                                                                                                                                                                                                   |                                                                                                                                                                                                                                                                                                                                                                                                                                                                                                                                                                                                                                                                                              |
|                                                                      | Has a Goals of Care form (MR/63D) been completed? <input type="checkbox"/> Yes <input type="checkbox"/> No <input type="checkbox"/> Unknown                                                                                                                                                                                                                                                                                                                                                                                                                                                                                                                                                                                                                                                                                                                                                                                                                      |                                                                                                                                                                                                                                                                                                                                                                                                                                                                                                                                                                                                                                                                                              |
|                                                                      | Call a MET if patient meets MET call criteria at any stage                                                                                                                                                                                                                                                                                                                                                                                                                                                                                                                                                                                                                                                                                                                                                                                                                                                                                                       |                                                                                                                                                                                                                                                                                                                                                                                                                                                                                                                                                                                                                                                                                              |
| Signs/ Symptoms                                                      | <p>1. Does your patient have two or more SIRS criteria, hypotension or altered mental state? (check boxes as appropriate)</p> <p><input type="checkbox"/> Temperature <math>&lt;36^{\circ}\text{C}</math> or <math>&gt;38^{\circ}\text{C}</math></p> <p><input type="checkbox"/> Heart Rate <math>&gt;90</math> per minute</p> <p><input type="checkbox"/> Resp Rate <math>&gt;20/\text{min}</math> Record rate _____</p> <p><input type="checkbox"/> WCC <math>&lt;4</math> or <math>&gt;12 \times 10^9/\text{L}</math></p> <p><input type="checkbox"/> Systolic BP <math>&lt;100\text{mmHg}</math></p> <p><input type="checkbox"/> Altered mental state</p> <p>2. Does your patient have clinical signs of hypoperfusion?</p> <p><input type="checkbox"/> Cool peripheries (hands and feet)</p> <p><input type="checkbox"/> Decreased/no urine output (for <math>&gt;8</math> hrs)</p>                                                                         | <p>3. Does your patients also have any of the following risk factors, signs or symptoms of infection?</p> <p><input type="checkbox"/> Neutropenia or recent chemotherapy</p> <p><input type="checkbox"/> Recent surgery/invasive procedure</p> <p><input type="checkbox"/> Skin: cellulitis, wound</p> <p><input type="checkbox"/> Neuro: decreased mental alertness, headache</p> <p><input type="checkbox"/> Urine: dysuria, frequency</p> <p><input type="checkbox"/> Abdomen: pain, peritonism</p> <p><input type="checkbox"/> Chest: cough, shortness of breath</p> <p><input type="checkbox"/> Indwelling medical device</p> <p><input type="checkbox"/> History of fever or rigor</p> |
| Notification using ISBAR                                             | <p>Ward: Doctor _____ Pager _____ Time ____:____ <input type="text"/> Initials</p> <p>ISBAR: Identify/Situation/Background/Assessment/Request</p>                                                                                                                                                                                                                                                                                                                                                                                                                                                                                                                                                                                                                                                                                                                                                                                                                |                                                                                                                                                                                                                                                                                                                                                                                                                                                                                                                                                                                                                                                                                              |
| Oxygen administration                                                | Aim SpO <sub>2</sub> $\geq 95\%$ (or 88-92% for COPD & chronic type II respiratory failure)                                                                                                                                                                                                                                                                                                                                                                                                                                                                                                                                                                                                                                                                                                                                                                                                                                                                      |                                                                                                                                                                                                                                                                                                                                                                                                                                                                                                                                                                                                                                                                                              |
| Ensure IV access                                                     | Large bore peripheral cannula inserted/available for fluid bolus, OR<br>If central venous access device already available: type (if applicable) _____                                                                                                                                                                                                                                                                                                                                                                                                                                                                                                                                                                                                                                                                                                                                                                                                            |                                                                                                                                                                                                                                                                                                                                                                                                                                                                                                                                                                                                                                                                                              |
| Blood cultures                                                       | <p>Two sets of blood cultures <input type="text"/> Initials</p> <p>(2 peripheral; or 1 from all lumens of device or port if accessible, plus 1 peripheral)</p>                                                                                                                                                                                                                                                                                                                                                                                                                                                                                                                                                                                                                                                                                                                                                                                                   |                                                                                                                                                                                                                                                                                                                                                                                                                                                                                                                                                                                                                                                                                              |
| Lactate                                                              | <p>Venous blood lactate (collect in blood gas syringe &amp; send to Biochemistry on ice) <input type="text"/> Initials</p> <p>Record lactate level _____ mmol/L</p>                                                                                                                                                                                                                                                                                                                                                                                                                                                                                                                                                                                                                                                                                                                                                                                              |                                                                                                                                                                                                                                                                                                                                                                                                                                                                                                                                                                                                                                                                                              |
| Pathology                                                            | <ul style="list-style-type: none"> <li>Collect FBC, UEC, CRP, LFTs, coags and blood glucose level</li> <li>Consider cross match if patient at risk of anaemia or known recent surgery</li> </ul> <p><b>Don't wait for confirmation of lab tests before commencing fluid resuscitation and first dose of antibiotics</b></p>                                                                                                                                                                                                                                                                                                                                                                                                                                                                                                                                                                                                                                      |                                                                                                                                                                                                                                                                                                                                                                                                                                                                                                                                                                                                                                                                                              |
| Fluid Resuscitate                                                    | <p><b>Fluids must have medical authorisation and be prescribed on the IV Therapy Chart (MR61A)</b></p> <ul style="list-style-type: none"> <li>Give RAPID fluid bolus STAT (preferably via rapid infusor)</li> <li>500mL 0.9% sodium chloride or Hartmann's solution</li> </ul> <p>1st bolus required and given <input type="checkbox"/> <input type="text"/> Initials</p> <p>If no response to initial fluid resuscitation (i.e. no improvement in hypotension)</p> <ul style="list-style-type: none"> <li>Repeat fluid bolus once</li> </ul> <p>2nd bolus required and given <input type="checkbox"/> <input type="text"/> Initials</p> <ul style="list-style-type: none"> <li>Caution if signs of pulmonary oedema, history of cardiac dysfunction or elderly patient</li> <li>Increased fluid volumes may be appropriate when administered in RMH ED or ward 7B.</li> </ul> <p><b>If blood pressure does not improve after fluid boluses – Call a MET</b></p> |                                                                                                                                                                                                                                                                                                                                                                                                                                                                                                                                                                                                                                                                                              |
| If hypotensive (SBP $<100\text{mmHg}$ ) or lactate $>2\text{mmol/L}$ |                                                                                                                                                                                                                                                                                                                                                                                                                                                                                                                                                                                                                                                                                                                                                                                                                                                                                                                                                                  |                                                                                                                                                                                                                                                                                                                                                                                                                                                                                                                                                                                                                                                                                              |

\*Cancer patients currently undergoing systemic chemotherapy require first antibiotic within 30 minutes

Surname: \_\_\_\_\_

Given Names: \_\_\_\_\_

Unit Number: \_\_\_\_\_

Date of Birth: \_\_\_\_\_

## ADULT SEPSIS PATHWAY

**These antibiotics are recommendations for the first dose only and must be prescribed on the medication chart (MR/61) by a medical officer.**

**1. Clinically examine the patient for a focus e.g. chest, urinary tract infection**

**For SUSPECTED or KNOWN source of infection:**

**HMO:** Go to **empiric antibiotic guide based on presumed site of infection** (on next page)

Have you checked the patient's allergy status? ☐

Circle the presumed site of infection and antibiotic on the empiric antibiotic guide. ☐

Have you completed Guidance MS® approval for administration after the 1st dose? ☐

Have antibiotics been administered within 30-60 minutes? ☐

Initials 

**or, 2. For UNKNOWN source of infection and/or NEUTROPENIC FEVER**

No penicillin allergy:

☐ **Piperacillin/tazobactam 4.5g IV** in 50mL 0.9% sodium chloride over 20 min

OR Non-life threatening penicillin allergy (e.g. rash):

☐ **Cefepime 2g IV** in 10mL 0.9% sodium chloride over 5 min

OR Life-threatening penicillin allergy:

☐ **Ciprofloxacin 400 mg IV** in 200mL (undiluted) over 60 min (prior to vancomycin)

**PLUS vancomycin IV** (see dosing table below) at 10mg/min

Initials 

Note: Use MEROPENEM (instead of piperacillin/tazobactam) if unknown focus, severe AND:

- patient is known to be colonised with multidrug resistant Gram-negative bacteria OR
- already been on broad spectrum IV antibiotics (e.g. piperacillin/tazobactam) OR
- travelled to area with high rate of multidrug resistant Gram-negative bacteria in last 12 months OR
- CNS infection not excluded eg. unconscious (give 2g for this)

☐ **Meropenem 1g IV** in 20mL 0.9% sodium chloride over 5 min

Initials 

**Plus consider ADDING if SEVERE SEPSIS (SBP <100 mmHg or lactate >2 mmol/L) and unknown source**

**VANCOMYCIN:**

| Patient's actual body weight | <50kg | 50 to 69kg | 70 to 100kg | >100kg |
|------------------------------|-------|------------|-------------|--------|
| Vancomycin loading dose      | 1g    | 1.5g       | 2g          | 2.5g   |

Initials 

Refer to Peter MacCallum vancomycin guidelines for ongoing dosing based on CrCl.

☐ **Vancomycin \_\_\_\_\_ g IV** as loading dose in an appropriate volume and infusion bag.

Concentration: Peripheral 5mg/mL, Central 10mg/mL. Maximum rate: 10mg/minute.

**GENTAMICIN:** Give STAT dose of gentamicin 5 mg/kg ideal or adjusted body weight up to 480mg

If CrCl <40mL/min gentamicin is not recommended. Discuss with consultant first.

☐ **Gentamicin \_\_\_\_\_ mg IV** in 100mL 0.9% sodium chloride over 30 min

Initials 

**Guidance MS® approval is required for administration of antibiotics after the 1st dose**

**If deteriorating call MET or if NOT improving - request review by High Acuity Team (pager 1110540) and inform treating team** ☐ Name of contact: \_\_\_\_\_ Time: \_\_\_\_\_

**Monitoring**

Has the patient been reviewed by the unit registrar or consultant?

Yes Contact: \_\_\_\_\_ Time: \_\_\_\_\_ Page again if no review within 1 hour

Monitor vital signs & fluid balance every 30 mins for 2 hours then hourly for 4 hours or more frequently as needed.

Keep oxygen saturation ≥95% (88-92% if at risk of CO<sub>2</sub> retention)

**Assess for deterioration which may include one or more of the following:**

☐ Increasing respiratory rate (fulfilling MET call criteria)

☐ SBP <100 mmHg

☐ Decreased or no improvement in consciousness

☐ Urine output <0.5 mL/kg/hour

☐ If lactate elevated repeat in 2 hours – if elevated >2 mmol/L contact High Acuity Team

**Investigation**

Initiate investigations for source of infection (one or more as indicated):

☐ Diagnostic imaging (e.g. CXR)

☐ Sputum for MCS

☐ Urine MSU (or CSU) for MCS

☐ Wound swab for MCS

☐ Throat swab for respiratory multiplex PCR

☐ Stool for C. difficile testing (if diarrhoea present)

**ALWAYS THINK ABOUT THE NEED FOR EARLY REFERRAL TO ID AND/OR SURGICAL TEAMS**



## Empiric antibiotic guide based on presumed site of infection

These guidelines **DO NOT replace an Infectious Diseases consult.**

**Review antibiotics daily** and de-escalate where appropriate (usually at 48-72 hours).

**If no microbiology results to guide therapy, switch from empiric antibiotics for severe to moderate to mild as patient improves.**

All antibiotic doses recommended in this guideline are for normal renal function with CrCl > 50 mL/min.

Dose reduction may be required in renal impairment.

|                                                                                                                                                                                                                                                                                                                                                                                                                                                                                                                                                                                                                   | No allergy to penicillin                                                                                                              | Non-immediate penicillin hypersensitivity                                             | Immediate penicillin / beta-lactam hypersensitivity                                                 |
|-------------------------------------------------------------------------------------------------------------------------------------------------------------------------------------------------------------------------------------------------------------------------------------------------------------------------------------------------------------------------------------------------------------------------------------------------------------------------------------------------------------------------------------------------------------------------------------------------------------------|---------------------------------------------------------------------------------------------------------------------------------------|---------------------------------------------------------------------------------------|-----------------------------------------------------------------------------------------------------|
| <b>UNKNOWN SOURCE OF INFECTION OR NEUTROPENIC FEVER</b>                                                                                                                                                                                                                                                                                                                                                                                                                                                                                                                                                           | piperacillin/tazobactam 4.5g IV 6-hourly                                                                                              | cefepime 2g IV 8-hourly                                                               | ciprofloxacin 400mg IV 12-hourly PLUS vancomycin IV                                                 |
| Consider adding <b>stat gentamicin</b> and <b>vancomycin</b> if severe sepsis.<br>Use <b>meropenem 1g IV 8-hourly</b> instead of <b>piperacillin-tazobactam</b> if severe sepsis AND known colonisation with resistant bacteria OR high risk travel within 12 months OR if meningitis not excluded (e.g. unconscious) as piperacillin-tazobactam has poor CNS penetration.<br>Consider adding <b>metronidazole IV 500mg 12-hourly</b> (to cefepime or ciprofloxacin regimens) if intra-abdominal infection possible.                                                                                              |                                                                                                                                       |                                                                                       |                                                                                                     |
| <b>High risk travel</b> includes Indian subcontinent, Asia, southern/eastern Europe                                                                                                                                                                                                                                                                                                                                                                                                                                                                                                                               |                                                                                                                                       |                                                                                       |                                                                                                     |
| <b>COMMUNITY ACQUIRED PNEUMONIA SEVERE</b>                                                                                                                                                                                                                                                                                                                                                                                                                                                                                                                                                                        | ceftriaxone 1g IV 12-hourly PLUS azithromycin 500mg IV daily                                                                          | ceftriaxone 1g IV 12-hourly PLUS azithromycin 500mg IV daily                          | moxifloxacin 400mg IV daily                                                                         |
| <b>MODERATE</b>                                                                                                                                                                                                                                                                                                                                                                                                                                                                                                                                                                                                   | benzylpenicillin 1.2g IV 6-hourly PLUS doxycycline 100mg oral 12-hourly                                                               | ceftriaxone 1g IV daily PLUS doxycycline 100mg oral 12-hourly                         | moxifloxacin 400mg oral/IV daily                                                                    |
| <b>MILD</b>                                                                                                                                                                                                                                                                                                                                                                                                                                                                                                                                                                                                       | amoxycillin 1g oral 8-hourly OR/AND doxycycline 100mg oral 12-hourly <b>7 days</b>                                                    | cefuroxime 500mg oral 12-hourly OR/AND doxycycline 100mg oral 12-hourly <b>7 days</b> | doxycycline 100mg oral 12-hourly <b>7 days</b>                                                      |
| Add oral <b>oseltamivir 75mg 12-hourly</b> if concerned about influenza<br>Replace ceftriaxone with <b>piperacillin-tazobactam 4.5g IV 6-hourly</b> OR <b>meropenem 1g IV 8-hourly</b> if severe AND known respiratory colonisation with resistant bacteria eg. <i>Pseudomonas</i><br>Consider additional treatment with <b>flucloxacillin 2g IV 6-hourly</b> and <b>vancomycin</b> if strongly suspect <i>Staph. aureus</i> in severe cases (eg. cavitating pneumonia or rapid clinical deterioration) <input type="checkbox"/> Refer to ID                                                                      |                                                                                                                                       |                                                                                       |                                                                                                     |
| <b>HOSPITAL ACQUIRED PNEUMONIA SEVERE</b>                                                                                                                                                                                                                                                                                                                                                                                                                                                                                                                                                                         | piperacillin/tazobactam 4.5g IV 6-hourly OR ceftriaxone 1g IV 12-hourly*                                                              | cefepime 2g IV 8-hourly OR ceftriaxone 1g IV 12-hourly*                               | clindamycin 600mg IV 8-hourly PLUS ciprofloxacin 400mg IV 8-hourly                                  |
| <b>MODERATE</b>                                                                                                                                                                                                                                                                                                                                                                                                                                                                                                                                                                                                   | ceftriaxone 1g IV daily                                                                                                               | ceftriaxone 1g IV daily                                                               | moxifloxacin 400mg IV/oral daily                                                                    |
| <b>MILD</b>                                                                                                                                                                                                                                                                                                                                                                                                                                                                                                                                                                                                       | amoxycillin/clavulanate 875/125mg oral 12-hourly <b>7 days</b>                                                                        | cefuroxime 500mg oral 12-hourly <b>7 days</b>                                         | moxifloxacin 400mg oral daily <b>7 days</b>                                                         |
| *Ceftriaxone can be used for severe HAP if: no shock/organ failure and no additional risk factors for multidrug resistant (MDR) bacteria (e.g. <5 days in ICU, no recent broad spectrum antibiotic use, no known respiratory colonisation with MDR Gram-negative bacteria, no significant immunosuppression).<br>Use <b>meropenem 1g IV 8-hourly</b> and consider adding <b>stat gentamicin IV</b> if severe sepsis and known respiratory colonisation with resistant bacteria e.g. <i>Pseudomonas</i> OR high risk travel within 12 months<br>Add <b>vancomycin</b> if patient has severe sepsis or septic shock |                                                                                                                                       |                                                                                       |                                                                                                     |
| <b>URINARY TRACT INFECTION SEVERE PYELONEPHRITIS</b>                                                                                                                                                                                                                                                                                                                                                                                                                                                                                                                                                              | piperacillin/tazobactam 4.5g IV 6-hourly and consider <b>stat gentamicin IV</b>                                                       | cefepime 2g IV 8-hourly and consider <b>stat gentamicin IV</b>                        | ciprofloxacin 400mg IV 12-hourly AND/OR <b>gentamicin IV</b>                                        |
| <b>MODERATE PYELONEPHRITIS</b>                                                                                                                                                                                                                                                                                                                                                                                                                                                                                                                                                                                    | ceftriaxone 1g IV daily OR (amoxycillin 2g IV 6-hourly PLUS *gentamicin IV)                                                           | ceftriaxone 1g IV daily OR *gentamicin IV                                             | ciprofloxacin 400mg IV 12-hourly OR *gentamicin IV                                                  |
| <b>MILD PYELONEPHRITIS</b>                                                                                                                                                                                                                                                                                                                                                                                                                                                                                                                                                                                        | trimethoprim 300mg oral daily OR amoxycillin/clavulanate 875/125mg oral 12-hourly OR cephalexin 500mg oral 6-hourly <b>10-14 days</b> | trimethoprim 300mg oral daily OR cephalexin 500mg oral 6-hourly <b>10-14 days</b>     | trimethoprim 300mg oral daily <b>10-14 days</b> OR ciprofloxacin 500mg oral 12-hourly <b>7 days</b> |
| Use <b>meropenem 1g IV 8-hourly</b> and consider need for <b>stat gentamicin IV</b> if severe AND known colonisation with resistant bacteria OR high risk travel within 12 months<br>*Gentamicin containing regimen is reasonable if no risk factors for gentamicin toxicity, and likely switch to oral antibiotics within 48 hours<br>Add <b>stat vancomycin</b> if severe and recent instrumentation (eg. nephrostomy)                                                                                                                                                                                          |                                                                                                                                       |                                                                                       |                                                                                                     |



|                                         | No allergy to penicillin                                                                                                                                  | Non-immediate penicillin hypersensitivity                                                                       | Immediate penicillin / beta-lactam hypersensitivity                                                                                                         |
|-----------------------------------------|-----------------------------------------------------------------------------------------------------------------------------------------------------------|-----------------------------------------------------------------------------------------------------------------|-------------------------------------------------------------------------------------------------------------------------------------------------------------|
| <b>WOMEN - cystitis</b>                 | trimethoprim 300mg oral daily<br><b>3 days</b><br>OR amoxicillin/clavulanate 500/125mg oral 12-hourly OR cephalexin 500mg oral 12-hourly<br><b>5 days</b> | trimethoprim 300mg oral daily<br><b>3 days</b><br>OR cephalexin 500mg oral 12-hourly<br><b>5 days</b>           | trimethoprim 300mg oral daily<br><b>3 days</b> OR norfloxacin 400mg oral 12-hourly<br><b>3 days</b> OR nitrofurantoin 100mg oral 12-hourly<br><b>5 days</b> |
| <b>MEN - cystitis</b>                   | <b>As above but for 7 days duration</b>                                                                                                                   |                                                                                                                 |                                                                                                                                                             |
| <b>INTRA-ABDOMINAL INFECTION SEVERE</b> | piperacillin/tazobactam 4.5g IV<br>6-hourly                                                                                                               | cefepime 2g IV 8-hourly PLUS metronidazole 500mg IV 12-hourly                                                   | ciprofloxacin 400mg IV 12-hourly PLUS metronidazole 500mg IV 12-hourly                                                                                      |
| <b>MODERATE</b>                         | ceftriaxone 1g IV daily PLUS metronidazole 500mg IV 12-hourly OR (amoxicillin PLUS gentamicin PLUS metronidazole*)                                        | ceftriaxone 1g IV daily PLUS metronidazole 500mg IV 12-hourly                                                   | ciprofloxacin 400mg IV 12-hourly PLUS metronidazole 500mg IV 12-hourly                                                                                      |
| <b>MILD</b>                             | amoxicillin/clavulanate 875/125mg oral 12-hourly<br><b>7 days</b>                                                                                         | trimethoprim/sulfamethoxazole 160/800mg oral 12-hourly PLUS metronidazole 400mg oral 12-hourly<br><b>7 days</b> | trimethoprim/sulfamethoxazole 160/800mg oral 12-hourly PLUS metronidazole 400mg oral 12-hourly<br><b>7 days</b>                                             |

\*Amoxicillin 2g IV 6-hourly plus gentamicin 5mg/kg IV daily plus metronidazole 500mg IV 12-hourly is reasonable if no risk factors for gentamicin toxicity, and likely switch to oral antibiotics within 48 hours

Use meropenem 1g IV 8-hourly and consider adding stat gentamicin IV if severe sepsis and either known colonisation with resistant bacteria OR high risk travel within 12 months

Consider adding antifungal treatment if severe sepsis and high risk patient, eg. extensive antibiotic use, *Candida* colonisation, parenteral nutrition, or prolonged ICU stay ☐ Refer to ID

|                                              |                                                                                              |                                                       |                                                                                        |
|----------------------------------------------|----------------------------------------------------------------------------------------------|-------------------------------------------------------|----------------------------------------------------------------------------------------|
| <b>SKIN AND SOFT TISSUE INFECTION SEVERE</b> | piperacillin/tazobactam 4.5g IV 6-hourly PLUS vancomycin IV                                  | cefepime 2g IV 8-hourly PLUS vancomycin IV            | clindamycin 600mg IV 8-hourly PLUS ciprofloxacin 400mg IV 12-hourly PLUS vancomycin IV |
| <b>MODERATE</b>                              | flucloxacillin 2g IV 6-hourly                                                                | cephazolin 2g IV 8-hourly                             | clindamycin 600mg IV 8-hourly OR vancomycin IV                                         |
| <b>MILD</b>                                  | flucloxacillin 500mg-1g oral 6-hourly<br><b>7-10 days</b>                                    | cephalexin 500mg-1g oral 6-hourly<br><b>7-10 days</b> | clindamycin 450mg oral 8-hourly<br><b>7-10 days</b>                                    |
|                                              | Add clindamycin 600mg IV 8-hourly if suspected toxic shock syndrome and discuss IVIg with ID |                                                       |                                                                                        |

|                              |                                                                                                                                                       |  |  |
|------------------------------|-------------------------------------------------------------------------------------------------------------------------------------------------------|--|--|
| <b>NECROTISING FASCIITIS</b> | meropenem 1g IV 8-hourly PLUS clindamycin 600mg IV 8-hourly PLUS vancomycin IV<br>Consider need for IVIg, discuss with ID. Early referral to surgery. |  |  |
|------------------------------|-------------------------------------------------------------------------------------------------------------------------------------------------------|--|--|

|                                                                                       |                                                                                                                                                                                                                                                                                                                                                                                                                                                                                               |                                            |                                       |
|---------------------------------------------------------------------------------------|-----------------------------------------------------------------------------------------------------------------------------------------------------------------------------------------------------------------------------------------------------------------------------------------------------------------------------------------------------------------------------------------------------------------------------------------------------------------------------------------------|--------------------------------------------|---------------------------------------|
| <b>INTRAVASCULAR CATHETER RELATED SEPSIS</b>                                          | piperacillin/tazobactam 4.5g IV 6-hourly PLUS vancomycin IV                                                                                                                                                                                                                                                                                                                                                                                                                                   | cefepime 2g IV 8-hourly PLUS vancomycin IV | vancomycin IV PLUS stat gentamicin IV |
| <b>*remove line</b><br>De-escalate as for skin & soft tissue infection if no pathogen | Use meropenem 1g IV 8-hourly PLUS vancomycin and consider stat gentamicin if known colonisation with resistant bacteria eg. <i>Pseudomonas</i> OR high risk travel within 12 months OR deterioration despite broad spectrum antibiotics<br>Consider adding antifungal cover if severe sepsis and high risk (eg. prolonged prior antibiotic exposure or prolonged intravenous access (eg. for parenteral nutrition) or known <i>Candida</i> colonisation) <input type="checkbox"/> Refer to ID |                                            |                                       |

|                                                                                                |                                                                                                                                                                                                                                                                                                                                                                                                                                                                                                                                                                                                         |                             |                             |
|------------------------------------------------------------------------------------------------|---------------------------------------------------------------------------------------------------------------------------------------------------------------------------------------------------------------------------------------------------------------------------------------------------------------------------------------------------------------------------------------------------------------------------------------------------------------------------------------------------------------------------------------------------------------------------------------------------------|-----------------------------|-----------------------------|
| <b>MENINGITIS</b><br>not associated with shunts / neurosurgical procedure<br>Always contact ID | ceftriaxone 2g IV 12-hourly                                                                                                                                                                                                                                                                                                                                                                                                                                                                                                                                                                             | ceftriaxone 2g IV 12-hourly | moxifloxacin 400mg IV daily |
|                                                                                                | Add dexamethasone 10mg IV 6-hourly for 4 days<br>Add benzylpenicillin 2.4g IV 4-hourly if risk factors for <i>Listeria</i> ; (eg. >50 years old, alcohol abuse, pregnant or immunocompromised). Trimethoprim/sulfamethoxazole can replace benzylpenicillin if penicillin allergy.<br>Add aciclovir 10mg/kg IV 8-hourly (ideal body weight) if viral encephalitis suspected.<br>Add vancomycin if: Gram-positive cocci in CSF, LP not done, pneumococcal Ag positive, recent sinusitis/ otitis media or recent beta lactam antibiotics. PMCC and RMH also endorses empiric use until pathogen identified |                             |                             |

**Vancomycin dose:** Load 25-30mg/kg IV (up to 2.5g), refer to PMCC vancomycin guideline; Use actual body weight. Reduce frequency in renal impairment. Higher doses may be used with expert advice.

**Gentamicin dose:** Give 5mg/kg IV stat. Higher doses up to 7mg/kg may be used in selected cases with expert advice. Not recommended in renal impairment (CrCl<40mL/min). Use ideal or adjusted body weight to calculate dose. Use >24 hours requires ID approval.

For more information refer to guidelines on iPolicy for vancomycin and gentamicin.

Where possible, recommendations are based on TG = Therapeutic Guidelines: Antibiotic The Antimicrobial Stewardship Team, January 2018
